# Supplementary material for: scLM: Automatic Detection of Consensus Gene Clusters Across Multiple Single-cell Datasets
Source: PubMed Central journal article supplement (PMC8602751; doi:10.1016/j.gpb.2020.09.002), 2020-12-24

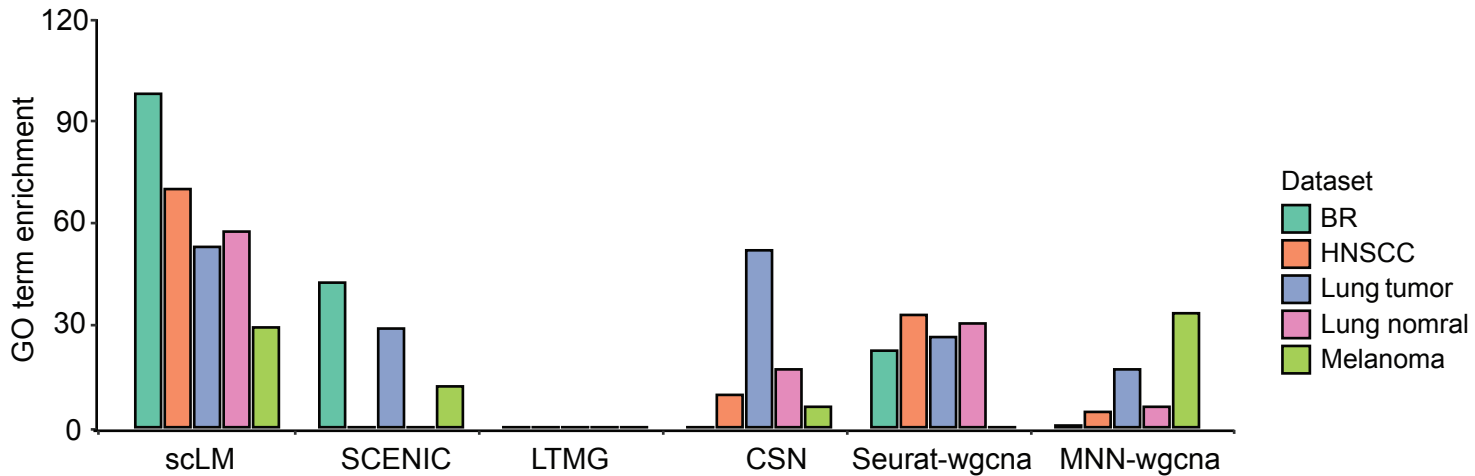

Supplement: mmc2.pdf [file mmc2.pdf]
