# Supplementary material for: scLM: Automatic Detection of Consensus Gene Clusters Across Multiple Single-cell Datasets
Source: PubMed Central journal article supplement (PMC8602751; doi:10.1016/j.gpb.2020.09.002), 2020-12-24

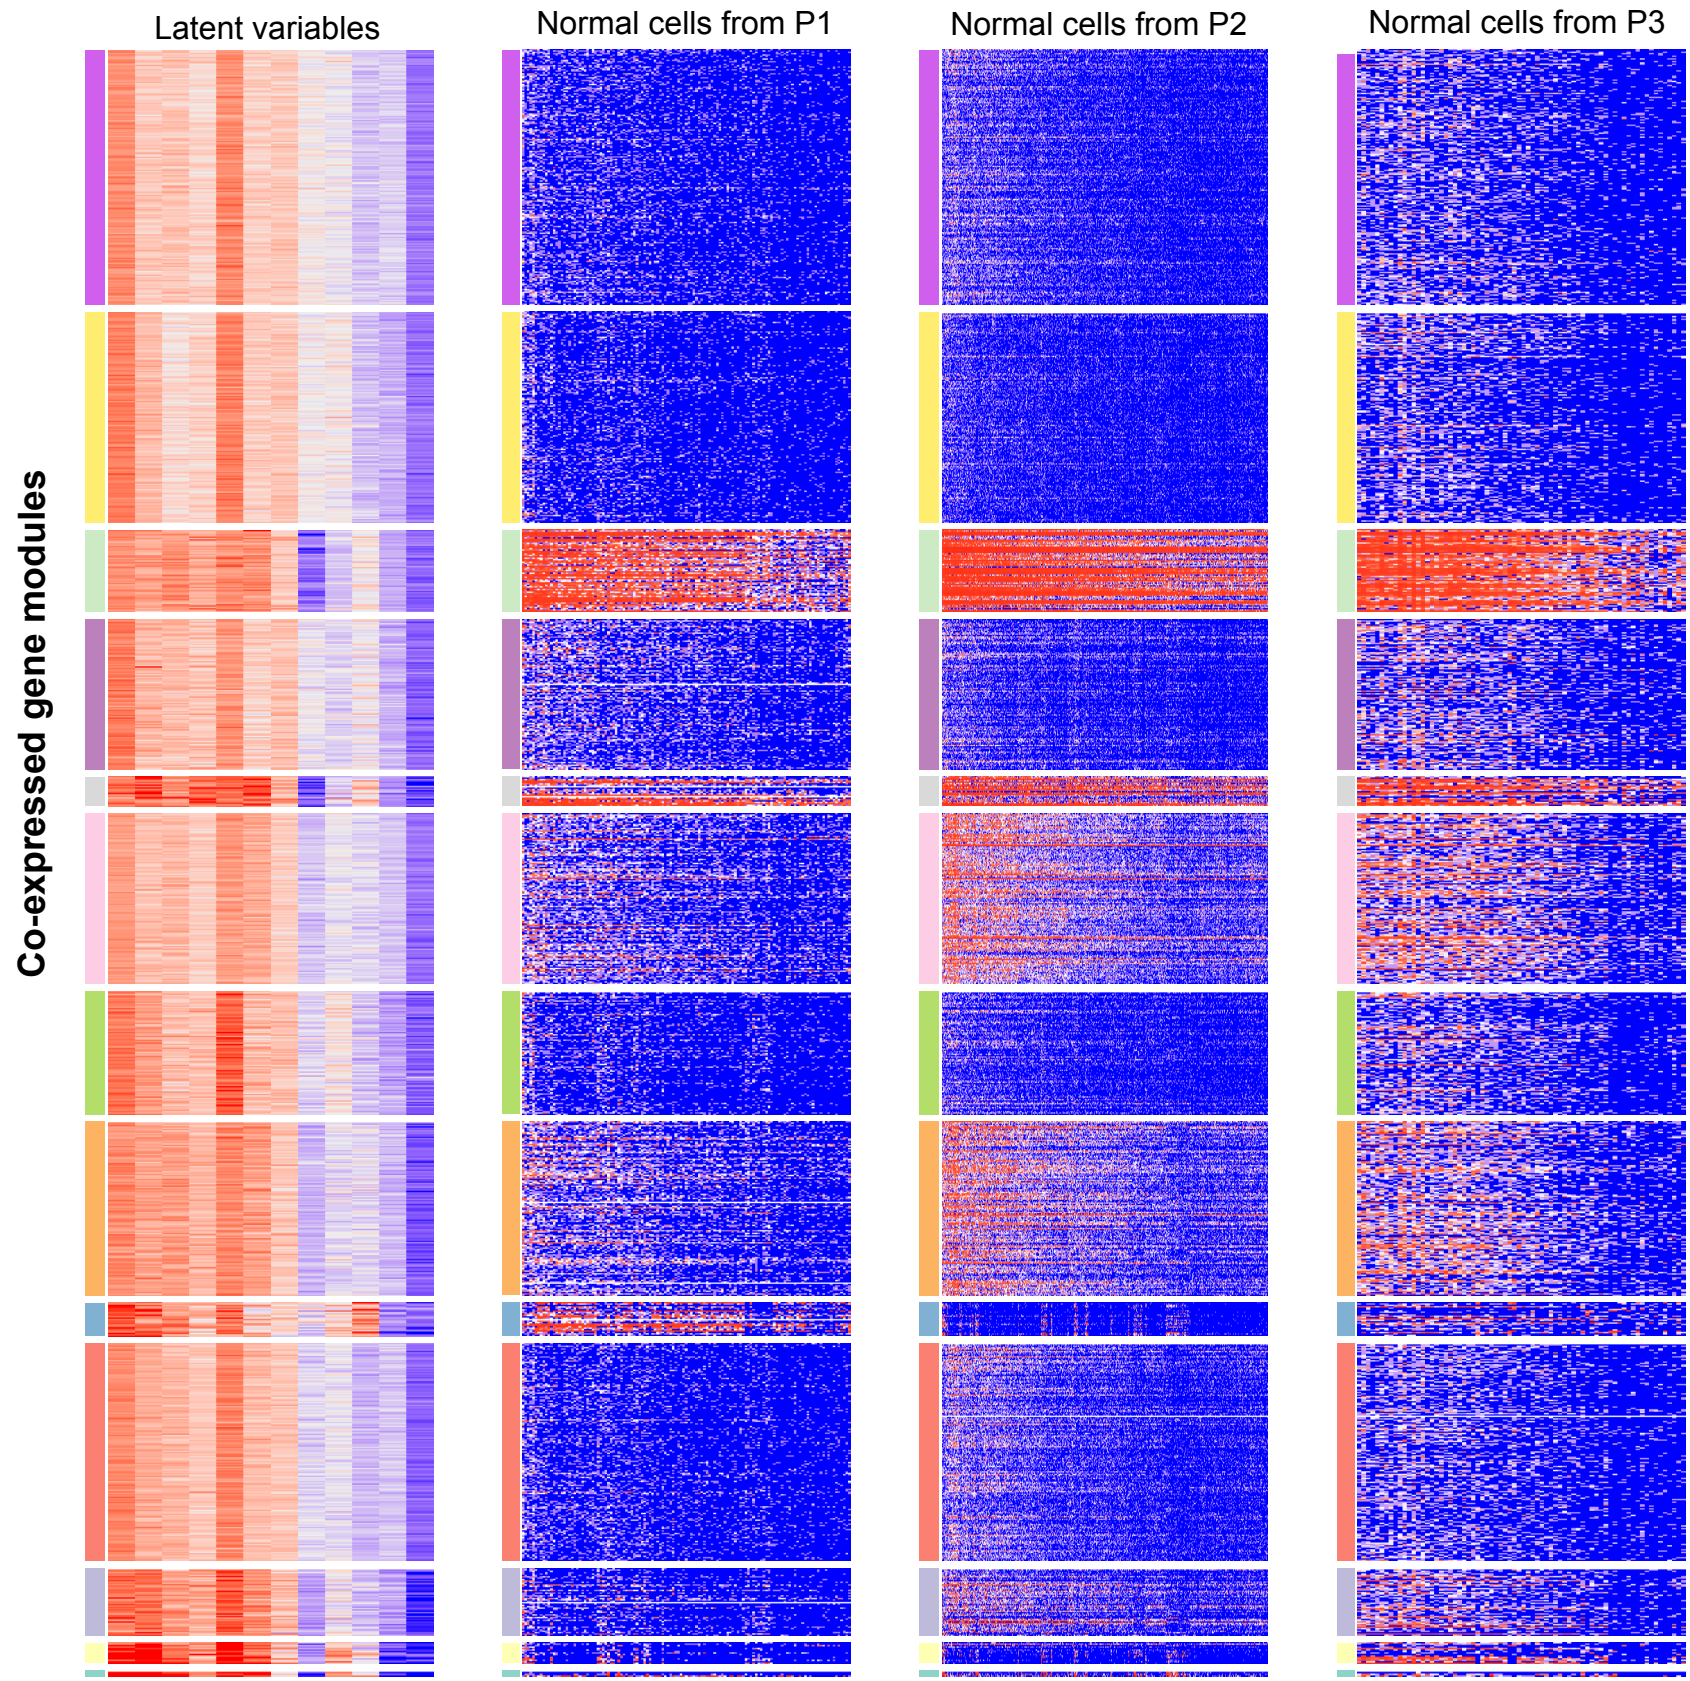

Latent variable level

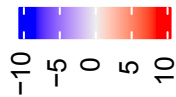

Gene expression (scaled UMI count)

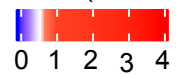

Co-expressed gene module

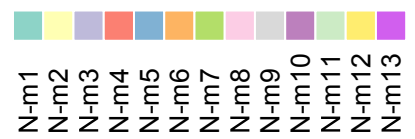

Supplement: mmc3.pdf [file mmc3.pdf]
