# Supplementary material for: scLM: Automatic Detection of Consensus Gene Clusters Across Multiple Single-cell Datasets
Source: PubMed Central journal article supplement (PMC8602751; doi:10.1016/j.gpb.2020.09.002), 2020-12-24

### A KEGG pathway enrichment

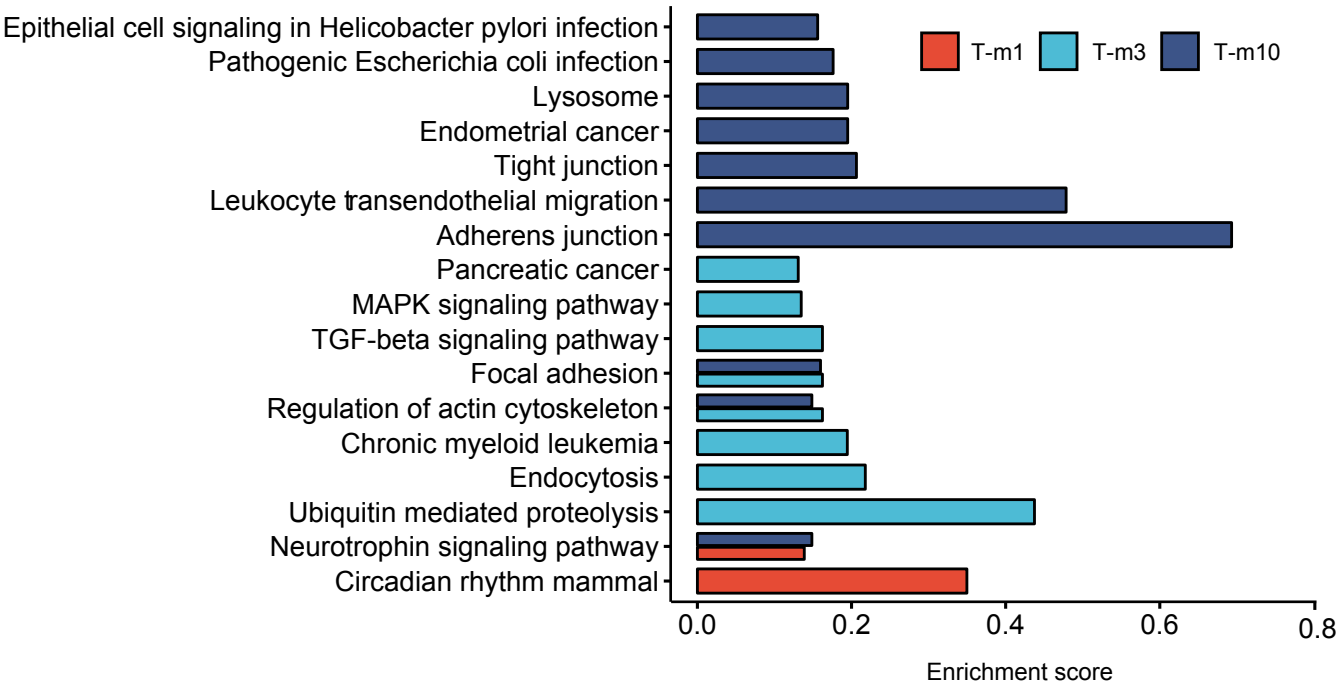

### B Reactome pathway enrichment

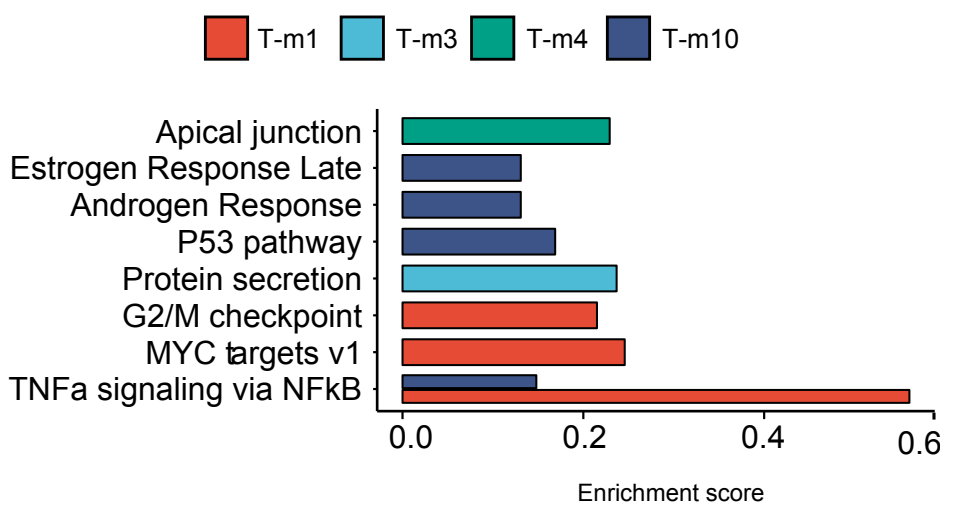

### C

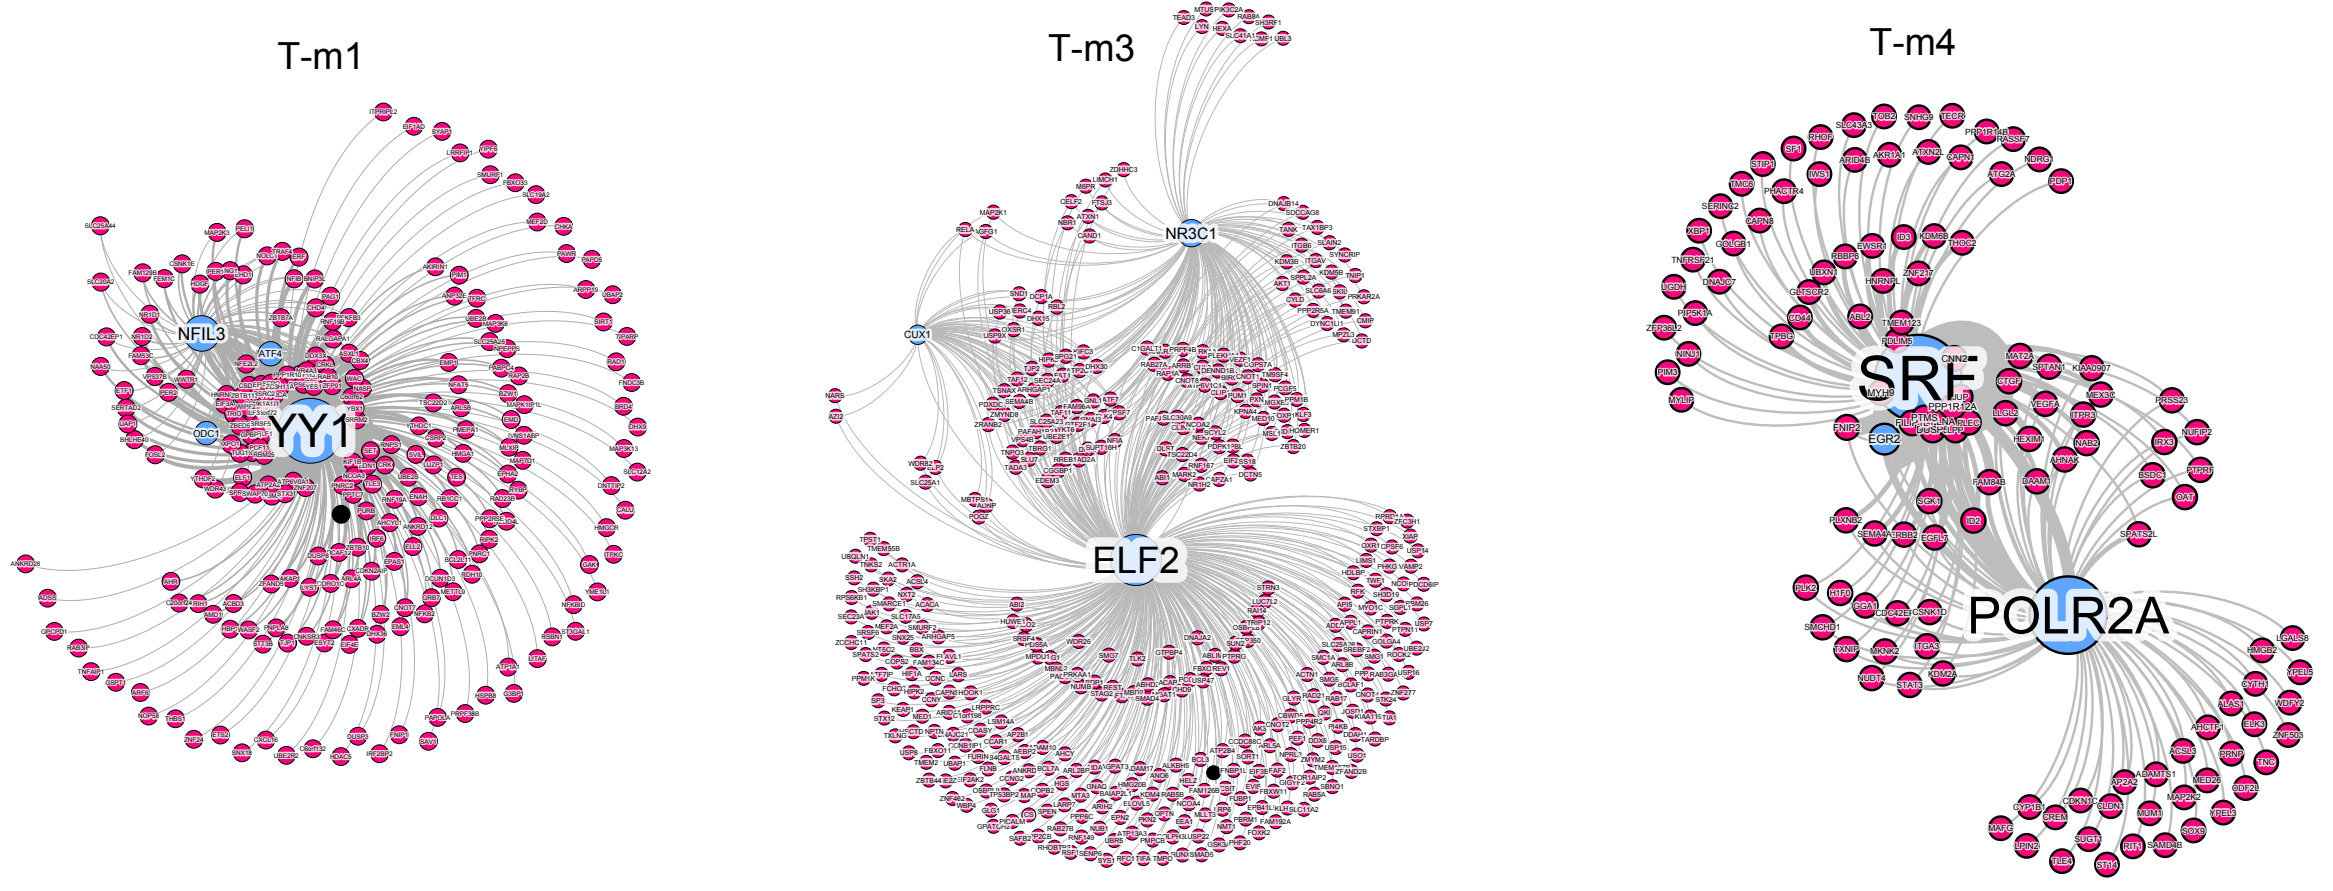

Supplement: mmc7.pdf [file mmc7.pdf]
