# Supplementary material for: scLM: Automatic Detection of Consensus Gene Clusters Across Multiple Single-cell Datasets
Source: PubMed Central journal article supplement (PMC8602751; doi:10.1016/j.gpb.2020.09.002), 2020-12-24

## A Kaplan-Meier survival curves of TCGA LUSC patients

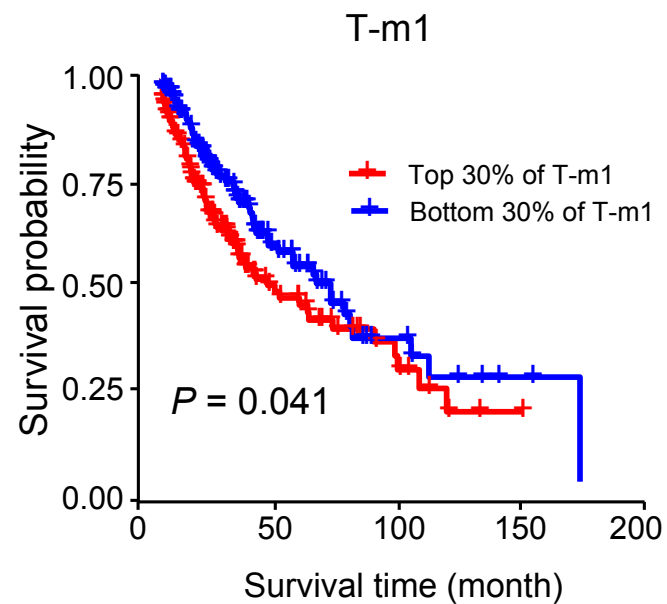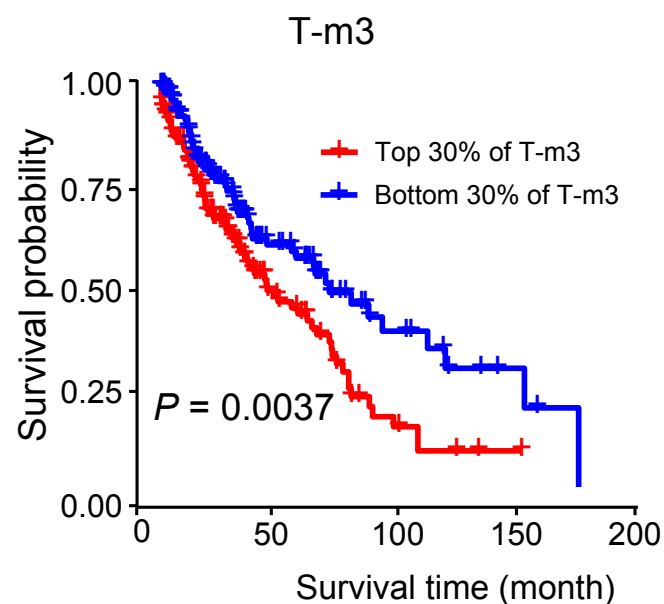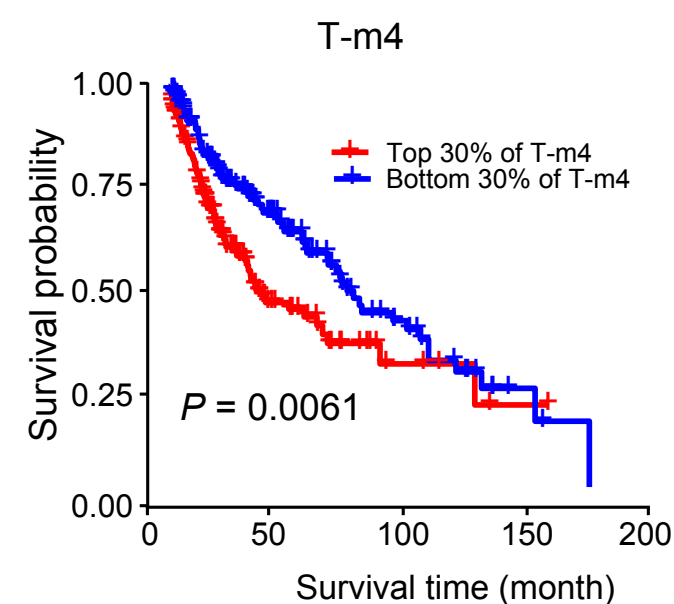

## B Kaplan-Meier survival curves of TCGA LUAD patients

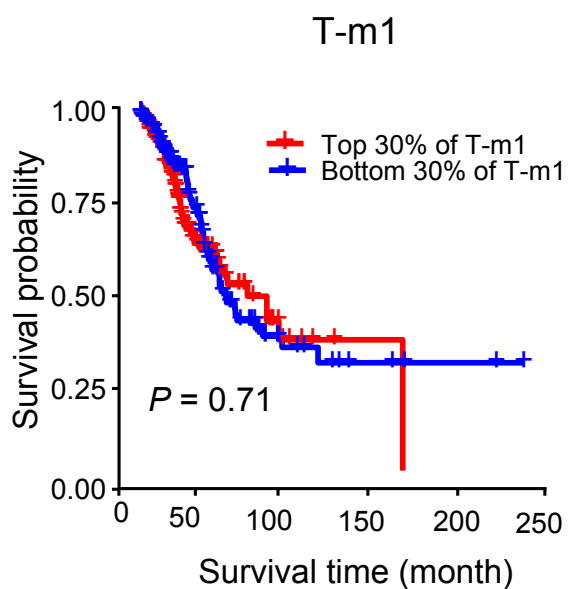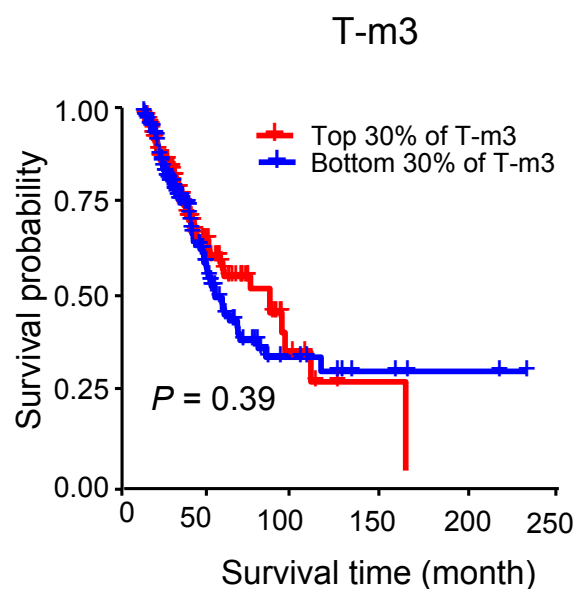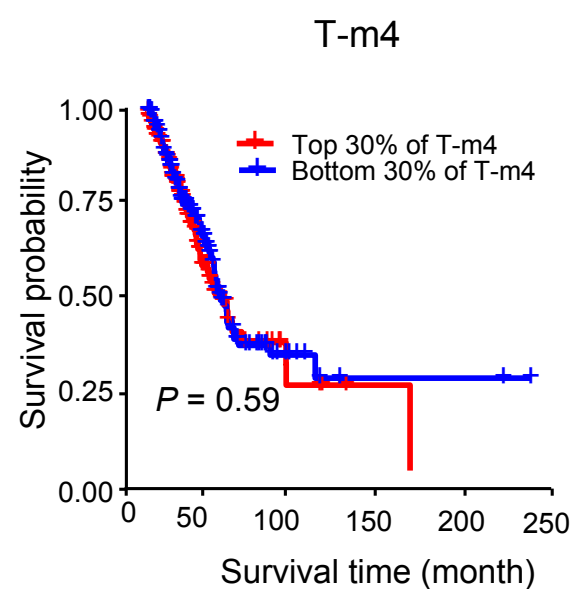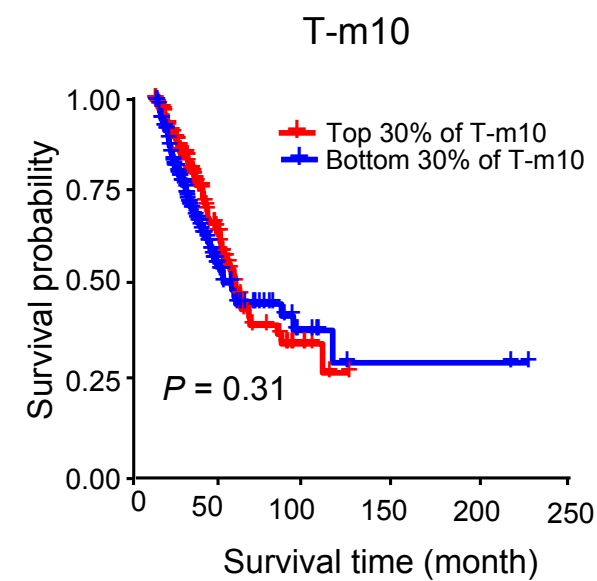

Supplement: mmc8.pdf [file mmc8.pdf]
